# Supplementary material for: The Aβ1–42/Aβ1–40 ratio in CSF is more strongly associated to tau markers and clinical progression than Aβ1–42 alone
Source: Springer Nature journal article supplement (doi:10.1186/s13195-022-00967-z), 2022-02-01

## SUPPLEMENTARY MATERIAL

### Table of Contents

|                                                                                                                                                                                       |    |
|---------------------------------------------------------------------------------------------------------------------------------------------------------------------------------------|----|
| Supplementary Table 1. Characteristics of the reference population of cognitively normal participants .....                                                                           | 2  |
| Supplementary Table 2. Quantile-based cutoffs used in this study .....                                                                                                                | 3  |
| Supplementary Table 3. Characteristics of the subset of participants included in the prognostic assessment .....                                                                      | 4  |
| Supplementary Figure 1. CSF biomarkers across clinical groups .....                                                                                                                   | 5  |
| Supplementary Figure 2. Distribution of participants according to their CSF levels of $A\beta_{1-42}$ and $A\beta_{1-42}/A\beta_{1-40}$ ratio within stages .....                     | 6  |
| Supplementary Figure 3. Distribution of participants according to their CSF levels of $A\beta_{1-42}$ and $A\beta_{1-42}/A\beta_{1-40}$ ratio with different cutoff definitions ..... | 7  |
| Supplementary Figure 4. Agreement of $A\beta_{1-42}$ and the $A\beta_{1-42}/A\beta_{1-40}$ ratio with tTau, pTau and NfL .....                                                        | 8  |
| Supplementary Figure 5. Agreement of $A\beta_{1-42}$ and the $A\beta_{1-42}/A\beta_{1-40}$ ratio with tTau, pTau and NfL in the groups of CN, AD and Down participants .....          | 9  |
| Supplementary Figure 6. Correlation of $A\beta_{1-42}$ and $A\beta_{1-42}/A\beta_{1-40}$ ratio with other CSF biomarkers .....                                                        | 10 |
| Supplementary Figure 7. Correlation of $A\beta_{1-42}$ and $A\beta_{1-42}/A\beta_{1-40}$ ratio with other CSF biomarkers within clinical stages .....                                 | 11 |
| Supplementary Figure 8. Correlation of $A\beta_{1-42}$ and $A\beta_{1-42}/A\beta_{1-40}$ ratio with other CSF biomarkers within amyloid profiles .....                                | 12 |
| Supplementary Figure 9. Levels of tTau (A), pTau181 (B) and NfL (C) in CSF according to their amyloid profile stratified by diagnosis .....                                           | 13 |
| Supplementary Figure 10. Levels of tTau (A), pTau181 (B) and NfL (C) in CSF according to their amyloid profile stratified by clinical stage .....                                     | 14 |
| Supplementary Figure 11. Levels of tTau, pTau181 and NfL in CSF according to their amyloid profile when different cutoffs were applied .....                                          | 15 |
| Supplementary Figure 12: Estimation of the annual change in cognitive and functional scores across amyloid profiles stratified by diagnosis .....                                     | 16 |

The  $A\beta_{1-42}/A\beta_{1-40}$  ratio in CSF is more strongly associated to tau markers and clinical progression than  $A\beta_{1-42}$  alone

Delaby et al.

### Supplementary Table 1. Characteristics of the reference population of cognitively normal participants

CSF cutoff points for  $A\beta_{1-42}$  and the  $A\beta_{1-42}/A\beta_{1-40}$  ratio for this study were defined by calculating a range of quantiles for each biomarker in a cognitively normal middle-aged population (below 60 years old) of 69 volunteers of the SPIN cohort. All volunteers in the SPIN cohort received a standard neuropsychological evaluation that was in normal range to ensure that cognition was preserved. Cerebrospinal fluid was obtained from all volunteers following the same standard preanalytical protocol followed in the present study. CSF levels of core AD biomarkers ( $A\beta_{1-42}$ ,  $A\beta_{1-40}$ , tTau, and pTau181) were measured in the Lumipulse fully-automated platform (Fujirebio Europe, Ghent, Belgium).

More details on the SPIN cohort protocol and inclusion/exclusion criteria can be found in Alcolea D et al. *Alzheimers Dement (N Y)* 2019.

| <b>N=69</b>                                           | <b>Mean (SD)</b> | <b>Range</b> |
|-------------------------------------------------------|------------------|--------------|
| <b>Age, years</b>                                     | 48.6 (9.67)      | 23-60        |
| <b>Female / Male (% Female)</b>                       | 46/23 (66.7%)    | -            |
| <b>MMSE score</b>                                     | 29.3 (0.905)     | 27-30        |
| <b>Education, years</b>                               | 17 (3.58)        | 8-20         |
| <b>Follow-up time, years</b>                          | 2.67 (2.22)      | 0-7.08       |
| <b>APOE4+ / APOE4- (%APOE4+)</b>                      | 24/45 (34.8%)    | -            |
| <b>CSF <math>A\beta_{1-42}</math>, pg/ml</b>          | 1154 (355)       | 597-2034     |
| <b>CSF <math>A\beta_{1-40}</math>, pg/ml</b>          | 11368 (2889)     | 5657-17404   |
| <b>CSF <math>A\beta_{1-42} / A\beta_{1-40}</math></b> | 0.101 (0.0143)   | 0.045-0.121  |
| <b>CSF tTau, pg/ml</b>                                | 232 (72.7)       | 111-404      |
| <b>CSF pTau181, pg/ml</b>                             | 33.2 (10.5)      | 18.2-66.8    |
| <b>CSF NfL, pg/ml</b>                                 | 350 (136)        | 104-725      |

The A $\beta$ <sub>1-42</sub>/A $\beta$ <sub>1-40</sub> ratio in CSF is more strongly associated to tau markers and clinical progression than A $\beta$ <sub>1-42</sub> alone

Delaby et al.

## Supplementary Table 2. Quantile-based cutoffs used in this study

As described in the Methods section, different cutoff levels were tested in this study. The framed row indicates the level that was used to present the main results and correspond to 95% quantile values in a cognitively normal population of participants < 60 years. Percentile scales for A $\beta$ <sub>1-42</sub> and the A $\beta$ <sub>1-42</sub>/A $\beta$ <sub>1-40</sub> ratio are reversed.

### Reference population: Cognitively normal participants <60 years

| Quantile   | A $\beta$ <sub>1-42</sub><br>(pg/ml) | A $\beta$ <sub>1-42</sub> / A $\beta$ <sub>1-40</sub><br>ratio | tTau<br>(pg/ml) | pTau181<br>(pg/ml) | NfL<br>(pg/ml) |
|------------|--------------------------------------|----------------------------------------------------------------|-----------------|--------------------|----------------|
| 2.5%       | 1898                                 | 0.119                                                          | 116             | 18.6               | 147            |
| 5%         | 1828                                 | 0.117                                                          | 131             | 19.4               | 165            |
| 10%        | 1663                                 | 0.114                                                          | 141             | 21.3               | 189            |
| 20%        | 1396                                 | 0.111                                                          | 166             | 23.7               | 220            |
| 30%        | 1317                                 | 0.108                                                          | 189             | 26                 | 287            |
| 50%        | 1107                                 | 0.104                                                          | 218             | 31.8               | 347            |
| 70%        | 929                                  | 0.102                                                          | 273             | 38.3               | 371            |
| 80%        | 829                                  | 0.098                                                          | 293             | 42.6               | 466            |
| 90%        | 732                                  | 0.082                                                          | 327             | 46.4               | 538            |
| <b>95%</b> | <b>637</b>                           | <b>0.07</b>                                                    | <b>357</b>      | <b>52.2</b>        | <b>554</b>     |
| 97.5%      | 617                                  | 0.06                                                           | 376             | 54.6               | 582            |

### Reference population: Cognitively normal participants >50 years

| Quantile | A $\beta$ <sub>1-42</sub><br>(pg/ml) | A $\beta$ <sub>1-42</sub> / A $\beta$ <sub>1-40</sub><br>ratio | tTau<br>(pg/ml) | pTau181<br>(pg/ml) | NfL<br>(pg/ml) |
|----------|--------------------------------------|----------------------------------------------------------------|-----------------|--------------------|----------------|
| 2.5%     | 1960                                 | 0.121                                                          | 141             | 20.5               | 218            |
| 5%       | 1813                                 | 0.12                                                           | 145             | 21.9               | 267            |
| 10%      | 1678                                 | 0.115                                                          | 174             | 24.5               | 287            |
| 20%      | 1569                                 | 0.11                                                           | 191             | 27.1               | 350            |
| 30%      | 1396                                 | 0.108                                                          | 220             | 32.5               | 375            |
| 50%      | 1166                                 | 0.103                                                          | 268             | 39.8               | 508            |
| 70%      | 880                                  | 0.094                                                          | 306             | 46.6               | 561            |
| 80%      | 779                                  | 0.072                                                          | 333             | 53.3               | 606            |
| 90%      | 667                                  | 0.058                                                          | 418             | 63.2               | 721            |
| 95%      | 604                                  | 0.05                                                           | 502             | 86.8               | 1193           |
| 97.5%    | 544                                  | 0.045                                                          | 659             | 109.9              | 1232           |

The  $A\beta_{1-42}/A\beta_{1-40}$  ratio in CSF is more strongly associated to tau markers and clinical progression than  $A\beta_{1-42}$  alone

Delaby et al.

### Supplementary Table 3. Characteristics of the subset of participants included in the prognostic assessment

CN: cognitively normal; AD: Alzheimer's disease; DLB: dementia with Lewy bodies; FTLN: frontotemporal lobar degeneration-related syndrome; MMSE : Mini-mental state examination.

|                                                                                                                                                                                                                        | AD                   | DLB                   | FTLD                  | Other                 |
|------------------------------------------------------------------------------------------------------------------------------------------------------------------------------------------------------------------------|----------------------|-----------------------|-----------------------|-----------------------|
| <b>N</b>                                                                                                                                                                                                               | 296                  | 60                    | 90                    | 348                   |
| <b>AGE, years</b>                                                                                                                                                                                                      | 74 [70-77.2]         | 75 [70.8-79]          | 70 [65-74]            | 71 [65-76]            |
| <b>SEX, females/males (%females)</b>                                                                                                                                                                                   | 181/115(61.1%)       | 35/25(58.3%)          | 35/55(38.9%)          | 199/148(57.3%)        |
| <b>MMSE score</b>                                                                                                                                                                                                      | 26 [24-27]           | 27 [24-28]            | 27 [25-28]            | 27 [25-28]            |
| <b>Education, years</b>                                                                                                                                                                                                | 10 [8-13]            | 8 [6.75-12]           | 12 [9-17.8]           | 10 [8-14]             |
| <b>APOE<math>\epsilon</math>4, APOE<math>\epsilon</math>4-/APOE<math>\epsilon</math>4+ (%APOE<math>\epsilon</math>4+)</b>                                                                                              | 149/141(51,4%)       | 14/46(23,3%)          | 19/68(21,8%)          | 68/277(19,7%)         |
| <b>Follow-up, years</b>                                                                                                                                                                                                | 0.567 [0-2.28]       | 3.68 [2.52-4.42]      | 1.68 [1.04-2.96]      | 0 [0-1.15]            |
| <b>A<math>\beta</math><sub>1-42</sub>, pg/ml</b>                                                                                                                                                                       | 568 [448-684]        | 728 [552-1110]        | 892 [626-1229]        | 1002 [689-1367]       |
| <b>A<math>\beta</math><sub>1-40</sub>, pg/ml</b>                                                                                                                                                                       | 13152 [10898-15467]  | 10990 [8897-13936]    | 10320 [8174-14531]    | 11376 [8618-14313]    |
| <b>A<math>\beta</math><sub>1-42</sub> / A<math>\beta</math><sub>1-40</sub></b>                                                                                                                                         | 0.0439 [0.0368-0.05] | 0.0735 [0.0514-0.102] | 0.0979 [0.0765-0.104] | 0.0961 [0.0692-0.105] |
| <b>tTau, pg/ml</b>                                                                                                                                                                                                     | 638 [485-863]        | 340 [248-490]         | 314 [218-433]         | 290 [215-370]         |
| <b>pTau181, pg/ml</b>                                                                                                                                                                                                  | 102 [78.4-140]       | 47.7 [34.5-78.8]      | 39.2 [28.8-53.2]      | 41.2 [30.4-52.1]      |
| <b>NfL, pg/ml</b>                                                                                                                                                                                                      | 931 [732-1114]       | 736 [640-905]         | 1186 [640-2141]       | 1295 [690-1995]       |
| <b>Amyloid profile (A<math>\beta</math><sub>1-42</sub>[-]Ratio[-] / A<math>\beta</math><sub>1-42</sub>[-]Ratio[+] / A<math>\beta</math><sub>1-42</sub>[+]Ratio[-] / A<math>\beta</math><sub>1-42</sub>[+]Ratio[+])</b> | 2/96/1/197           | 30/8/2/20             | 62/5/9/14             | 242/32/16/58          |

The  $A\beta_{1-42}/A\beta_{1-40}$  ratio in CSF is more strongly associated to tau markers and clinical progression than  $A\beta_{1-42}$  alone

Delaby et al.

### Supplementary Figure 1. CSF biomarkers across clinical groups

CN: cognitively normal; AD: Alzheimer's disease; DLB: dementia with Lewy bodies; FTLD: frontotemporal lobar degeneration-related syndrome. Horizontal dashed lines indicate 95% quantile values (Q95%) for  $A\beta_{1-42}$  and  $A\beta_{1-42}/A\beta_{1-40}$  in a middle-aged cognitively normal population as described in the Methods section.

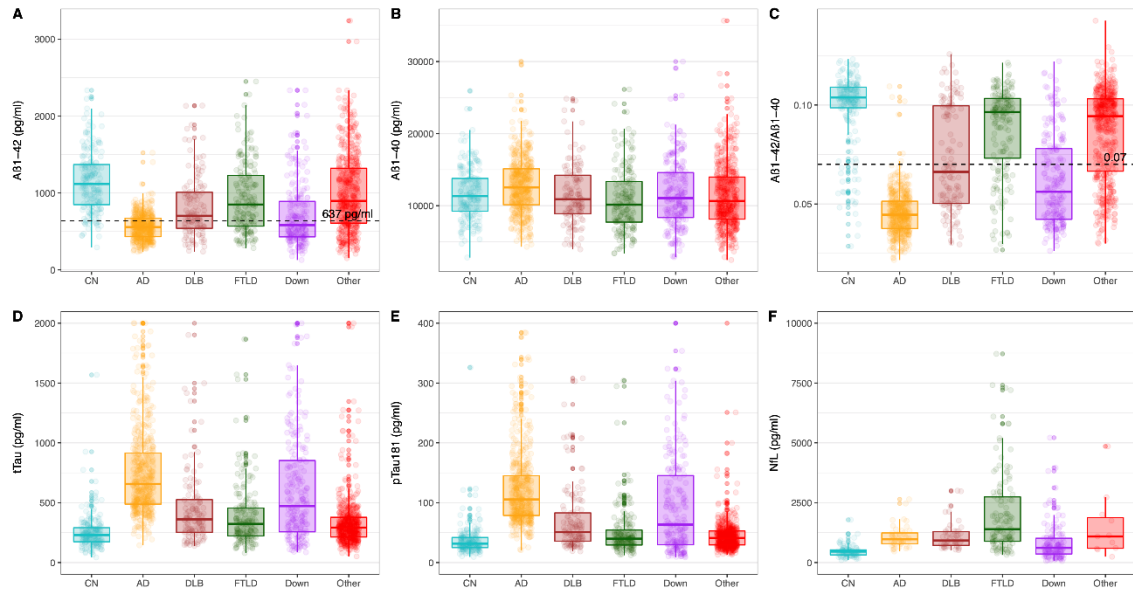

The  $A\beta_{1-42}/A\beta_{1-40}$  ratio in CSF is more strongly associated to tau markers and clinical progression than  $A\beta_{1-42}$  alone

Delaby et al.

## Supplementary Figure 2. Distribution of participants according to their CSF levels of $A\beta_{1-42}$ and $A\beta_{1-42}/A\beta_{1-40}$ ratio within stages

CN: cognitively normal; AD: Alzheimer's disease; DLB: dementia with Lewy bodies; FTLD: frontotemporal lobar degeneration-related syndrome; MCI: mild cognitive impairment. Dashed lines indicate 95% quantile values (Q95%) for  $A\beta_{1-42}$  and  $A\beta_{1-42}/A\beta_{1-40}$  in a middle-aged cognitively normal population as described in the Methods section.

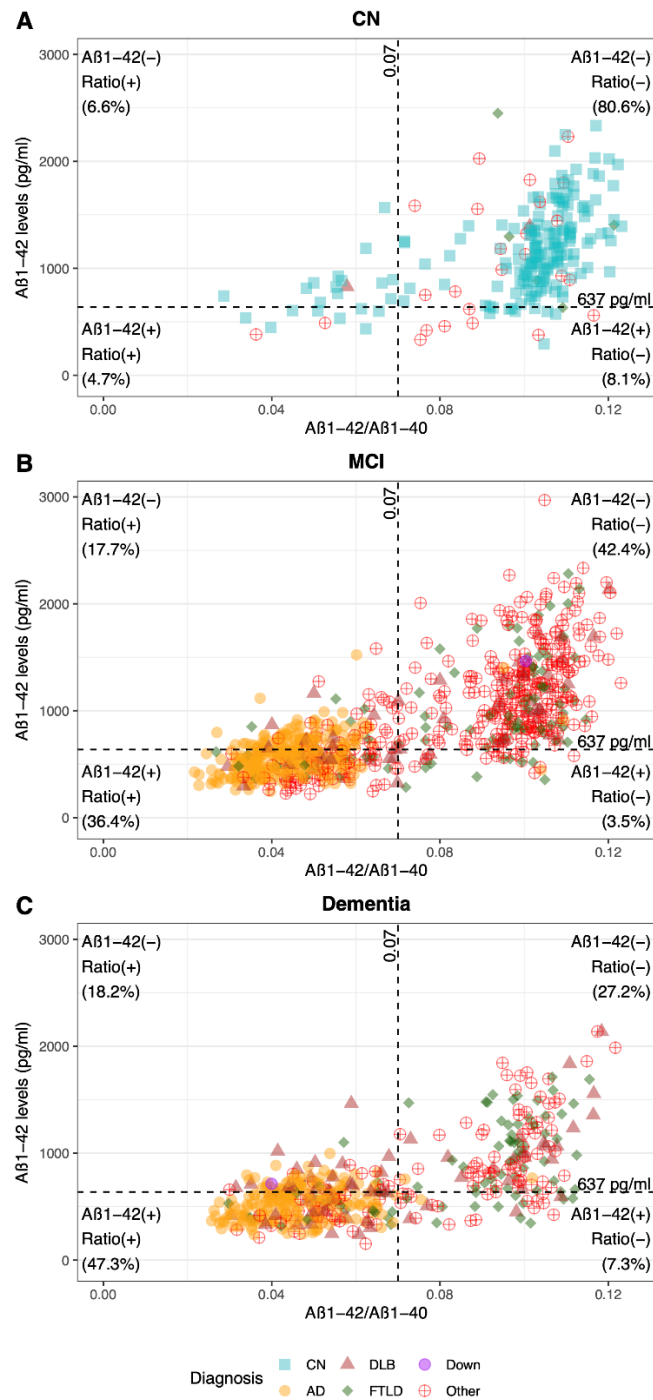

The  $A\beta_{1-42}/A\beta_{1-40}$  ratio in CSF is more strongly associated to tau markers and clinical progression than  $A\beta_{1-42}$  alone

Delaby et al.

**Supplementary Figure 3. Distribution of participants according to their CSF levels of  $A\beta_{1-42}$  and  $A\beta_{1-42}/A\beta_{1-40}$  ratio with different cutoff definitions**

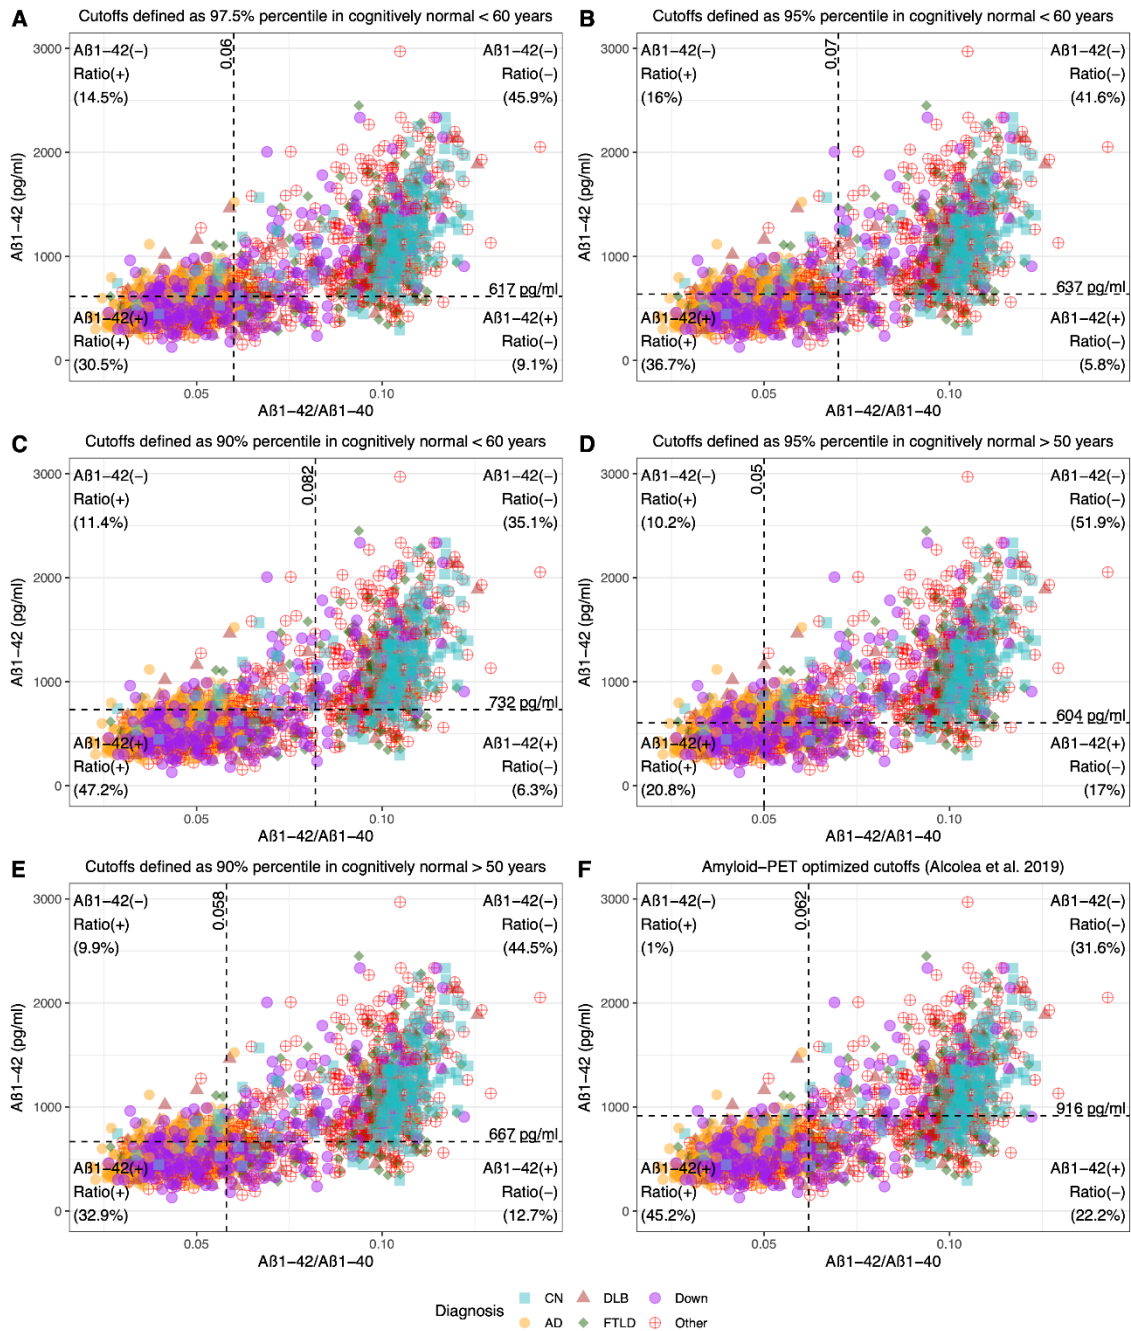

**Supplementary Figure 4. Agreement of  $A\beta_{1-42}$  and the  $A\beta_{1-42}/A\beta_{1-40}$  ratio with tTau, pTau and NfL**

CN: cognitively normal; AD: Alzheimer’s disease; DLB: dementia with Lewy bodies; FTLD: frontotemporal lobar degeneration-related syndrome; MCI: mild cognitive impairment. Dashed lines indicate 95% quantile values (Q95%) in a middle-aged cognitively normal population as described in the Methods section.

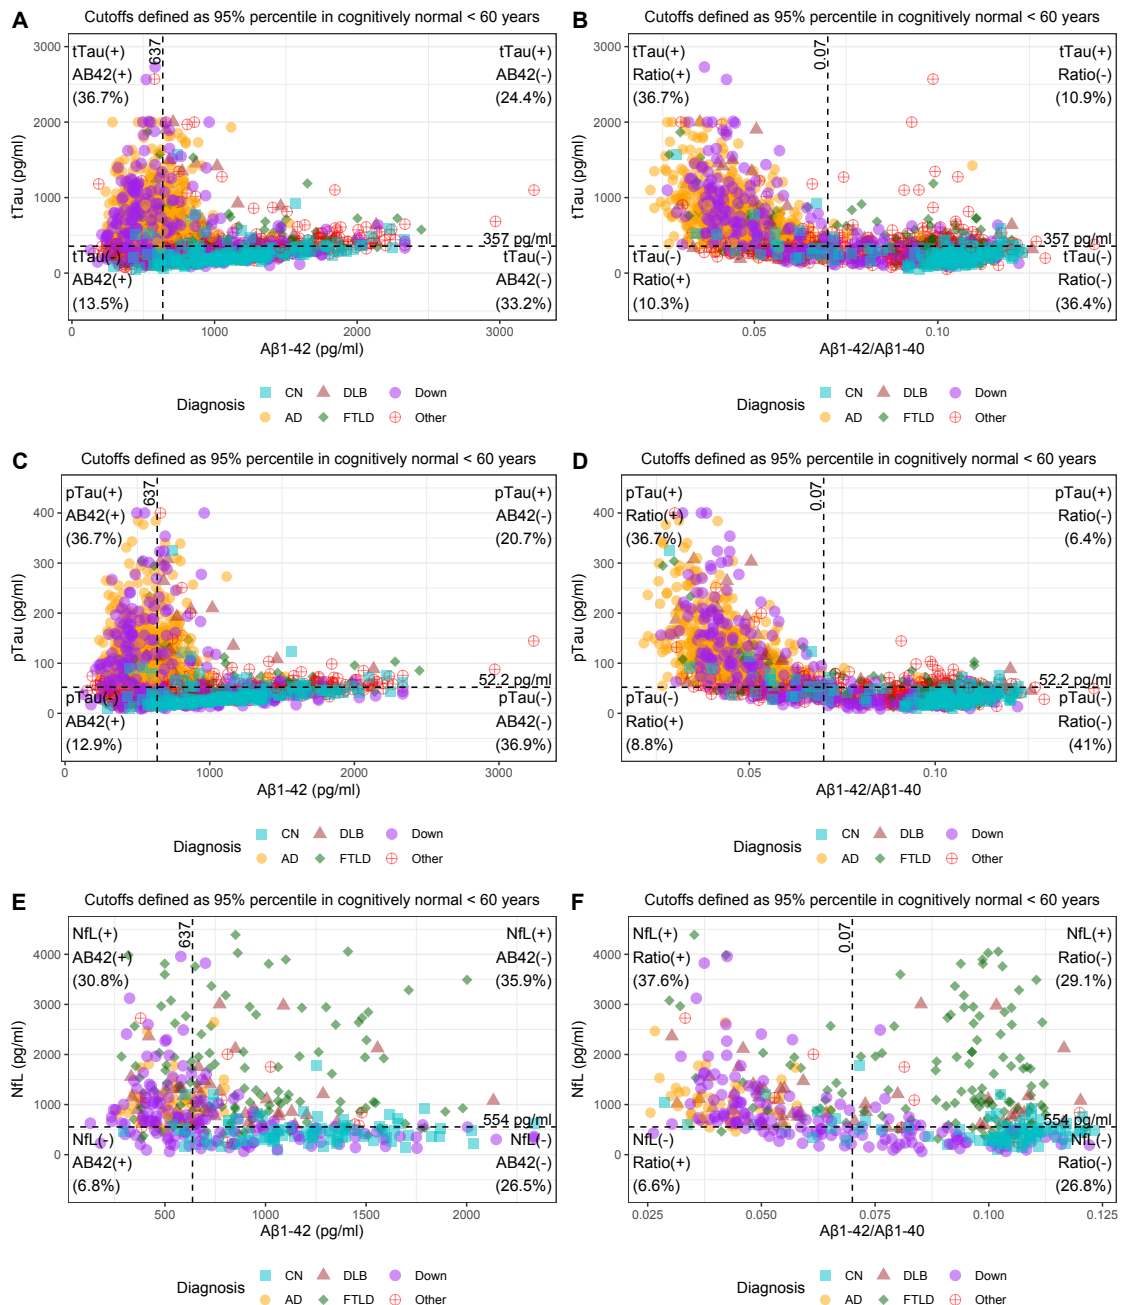



The  $A\beta_{1-42}/A\beta_{1-40}$  ratio in CSF is more strongly associated to tau markers and clinical progression than  $A\beta_{1-42}$  alone

Delaby et al.

### Supplementary Figure 5. Agreement of $A\beta_{1-42}$ and the $A\beta_{1-42}/A\beta_{1-40}$ ratio with tTau, pTau and NfL in the groups of CN, AD and Down participants

CN: cognitively normal; AD: Alzheimer's disease. Dashed lines indicate 95% quantile values (Q95%) in a middle-aged cognitively normal population as described in the Methods section.

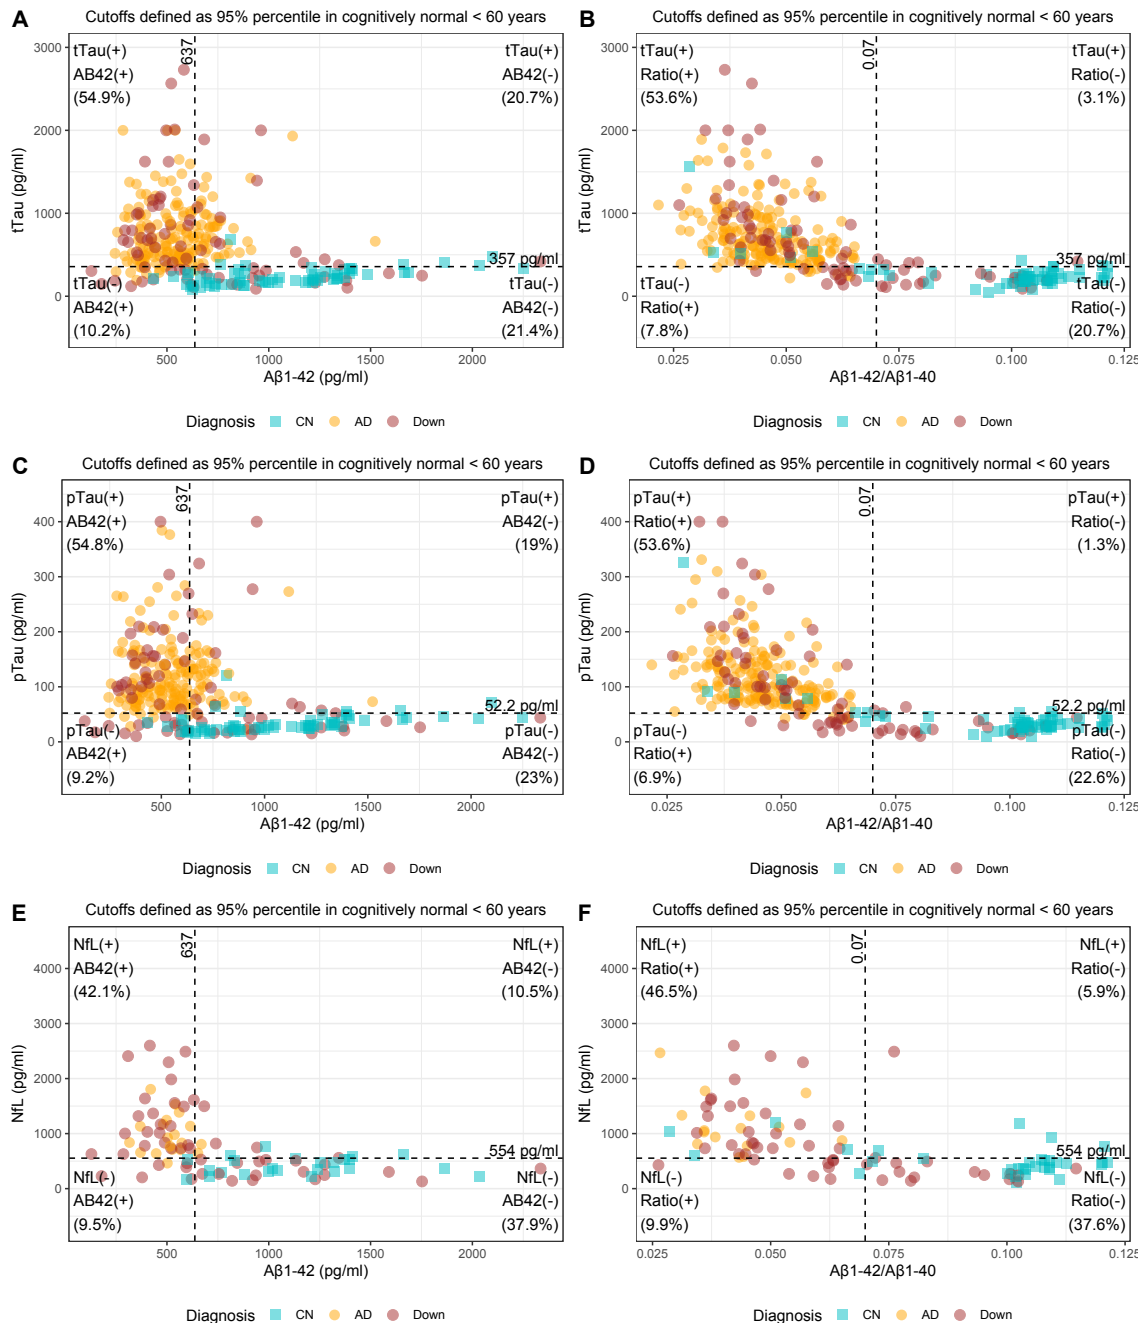

The  $A\beta_{1-42}/A\beta_{1-40}$  ratio in CSF is more strongly associated to tau markers and clinical progression than  $A\beta_{1-42}$  alone

Delaby et al.

### Supplementary Figure 6. Correlation of $A\beta_{1-42}$ and $A\beta_{1-42}/A\beta_{1-40}$ ratio with other CSF biomarkers

Values in the cells correspond to Spearman's Rho coefficient. Shaded cells indicate significant correlations after adjustment for multiple comparisons. All paired correlations were assessed, but only significant correlations are displayed. CN: Cognitively normal; AD: Alzheimer's disease; DLB: dementia with Lewy bodies; FTLT: Frontotemporal lobar degeneration-related syndromes.

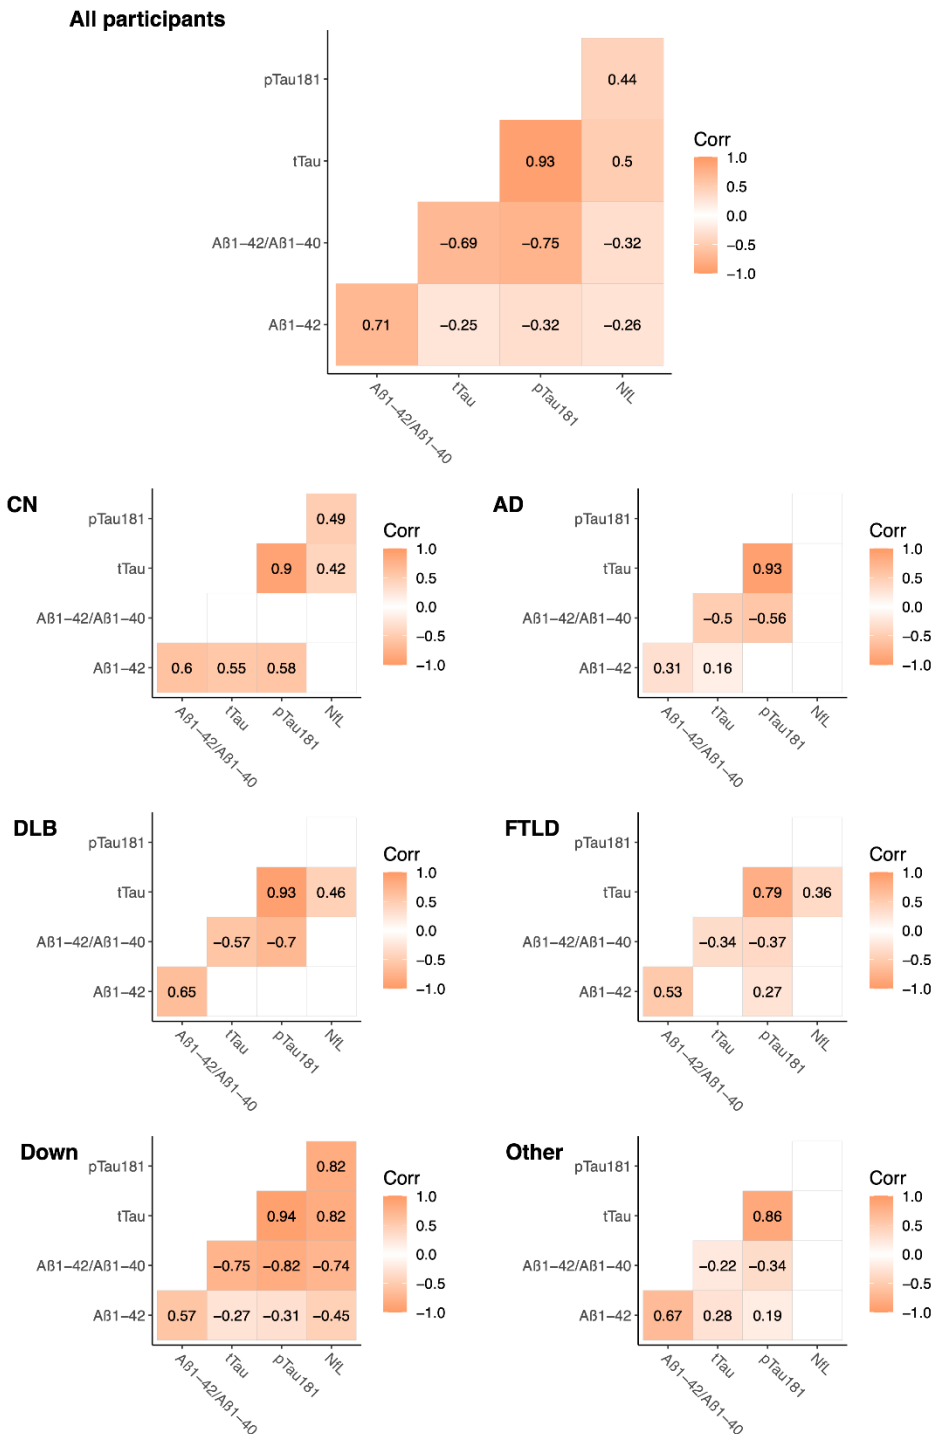

The  $A\beta_{1-42}/A\beta_{1-40}$  ratio in CSF is more strongly associated to tau markers and clinical progression than  $A\beta_{1-42}$  alone

Delaby et al.

### Supplementary Figure 7. Correlation of $A\beta_{1-42}$ and $A\beta_{1-42}/A\beta_{1-40}$ ratio with other CSF biomarkers within clinical stages

Values in the cells correspond to Spearman's Rho coefficient. Shaded cells indicate significant correlations after adjustment for multiple comparisons. All paired correlations were assessed, but only significant correlations are displayed. CN: Cognitively normal; MCI: mild cognitive impairment.

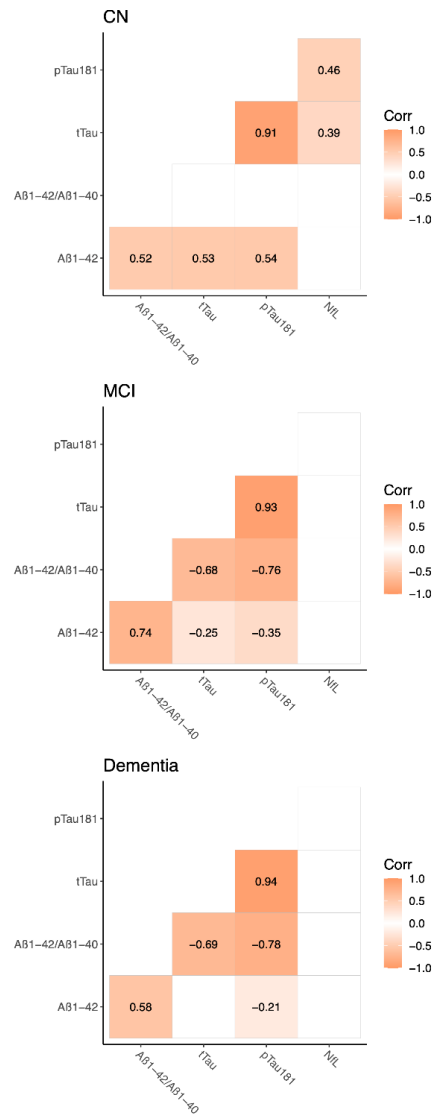

The  $A\beta_{1-42}/A\beta_{1-40}$  ratio in CSF is more strongly associated to tau markers and clinical progression than  $A\beta_{1-42}$  alone

Delaby et al.

### Supplementary Figure 8. Correlation of $A\beta_{1-42}$ and $A\beta_{1-42}/A\beta_{1-40}$ ratio with other CSF biomarkers within amyloid profiles

Values in the cells correspond to Spearman's Rho coefficient. Shaded cells indicate significant correlations after adjustment for multiple comparisons. All paired correlations were assessed, but only significant correlations are displayed.

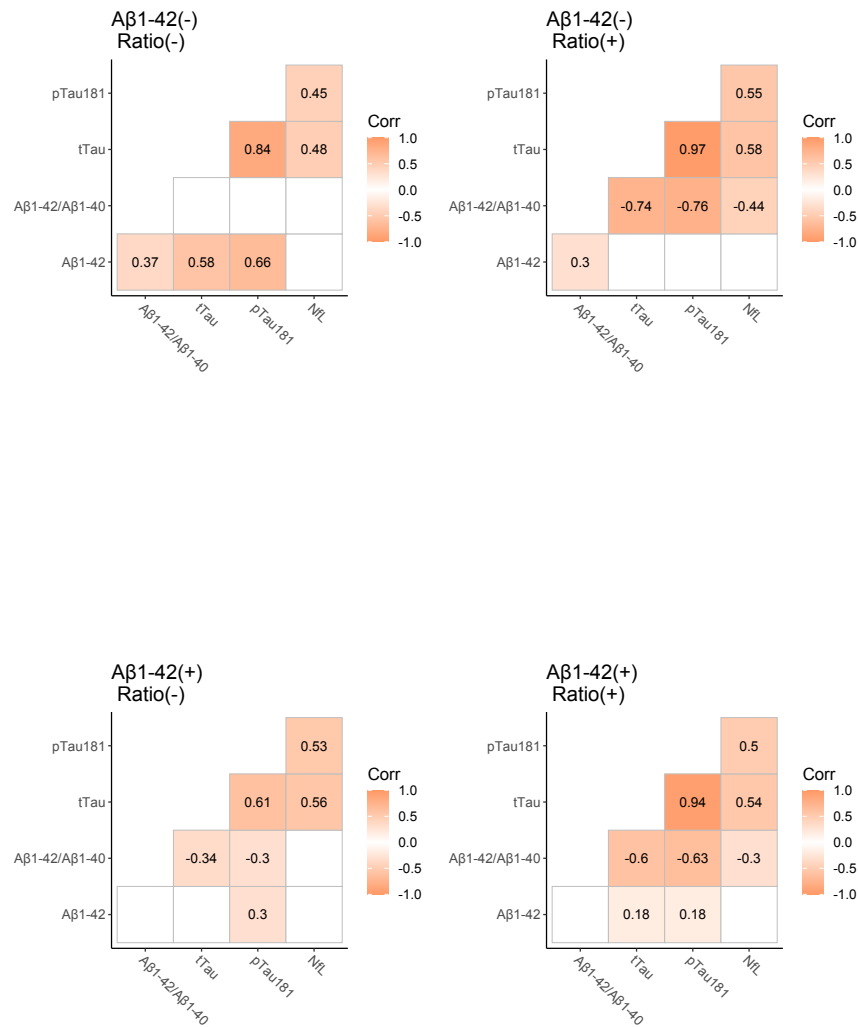

The  $A\beta_{1-42}/A\beta_{1-40}$  ratio in CSF is more strongly associated to tau markers and clinical progression than  $A\beta_{1-42}$  alone

Delaby et al.

### Supplementary Figure 9. Levels of tTau (A), pTau181 (B) and NfL (C) in CSF according to their amyloid profile stratified by diagnosis

CN: Cognitively normal; AD: Alzheimer's disease; DLB: dementia with Lewy bodies; FTLD: Frontotemporal lobar degeneration-related syndromes.

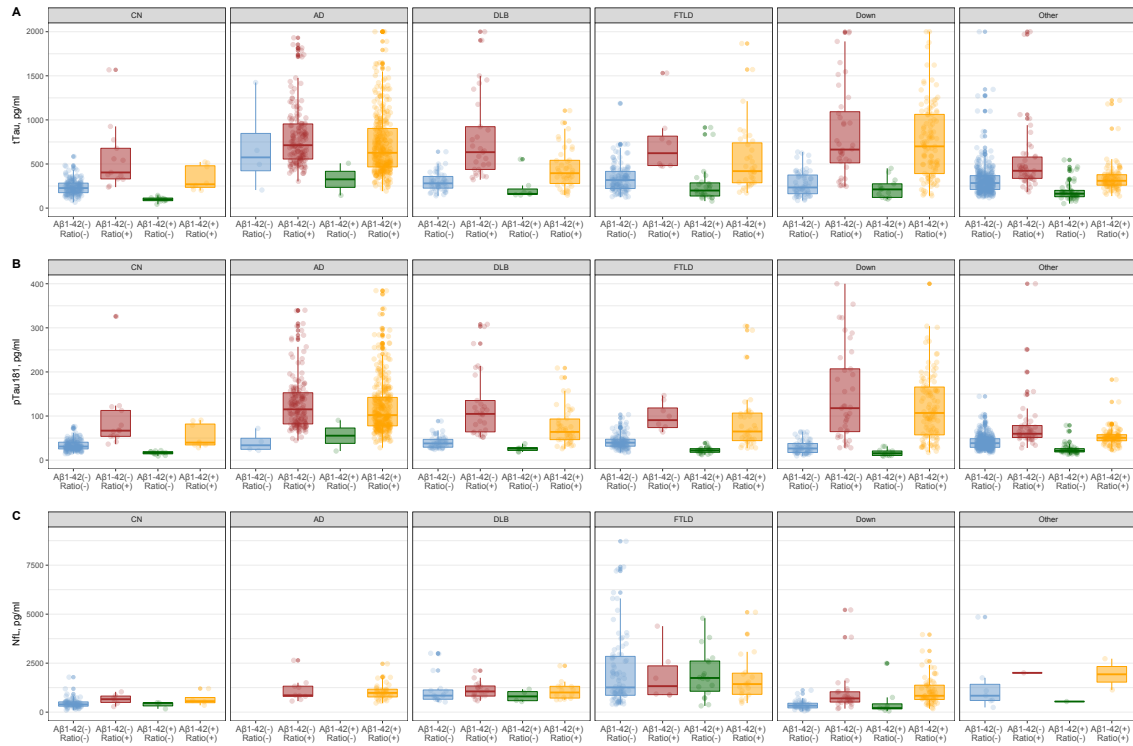

The  $A\beta_{1-42}/A\beta_{1-40}$  ratio in CSF is more strongly associated to tau markers and clinical progression than  $A\beta_{1-42}$  alone

Delaby et al.

### Supplementary Figure 10. Levels of tTau (A), pTau181 (B) and NfL (C) in CSF according to their amyloid profile stratified by clinical stage

CN: Cognitively normal; MCI: Mild cognitive impairment.

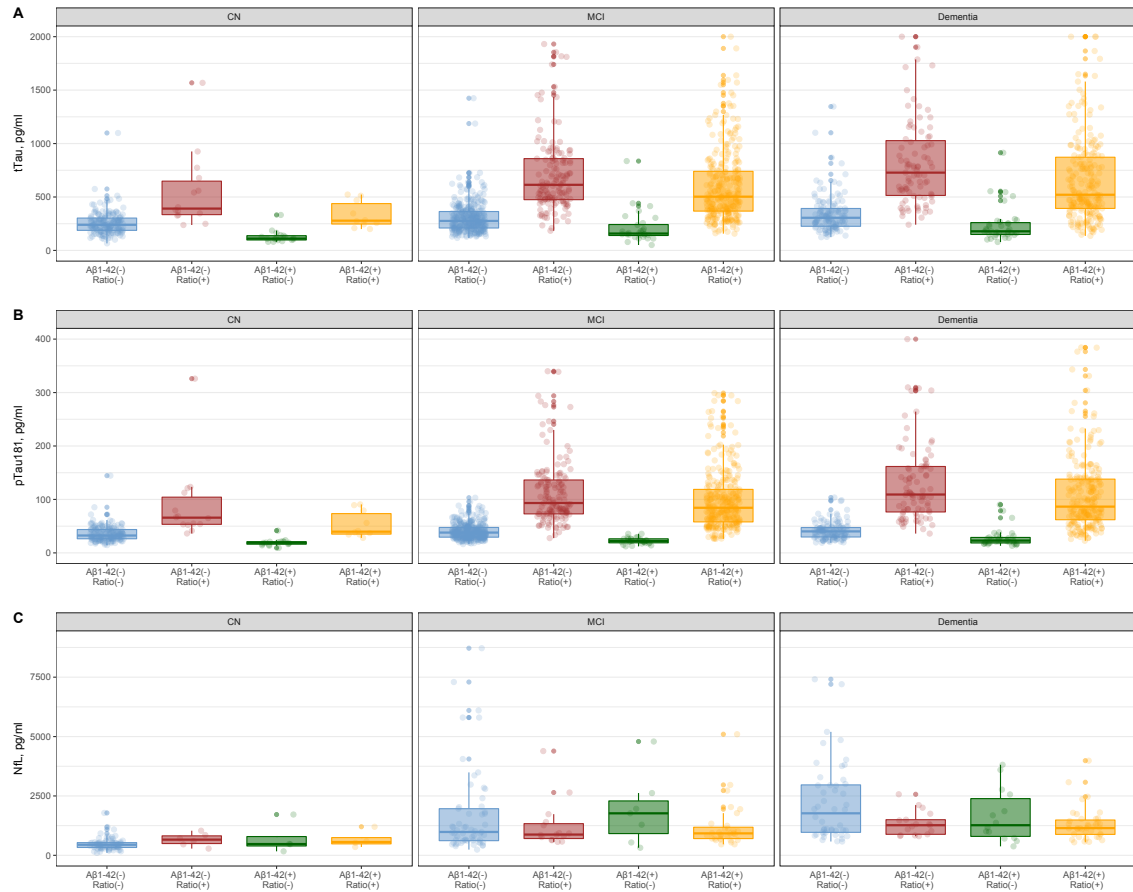

**Supplementary Figure 11. Levels of tTau, pTau181 and NfL in CSF according to their amyloid profile when different cutoffs were applied**

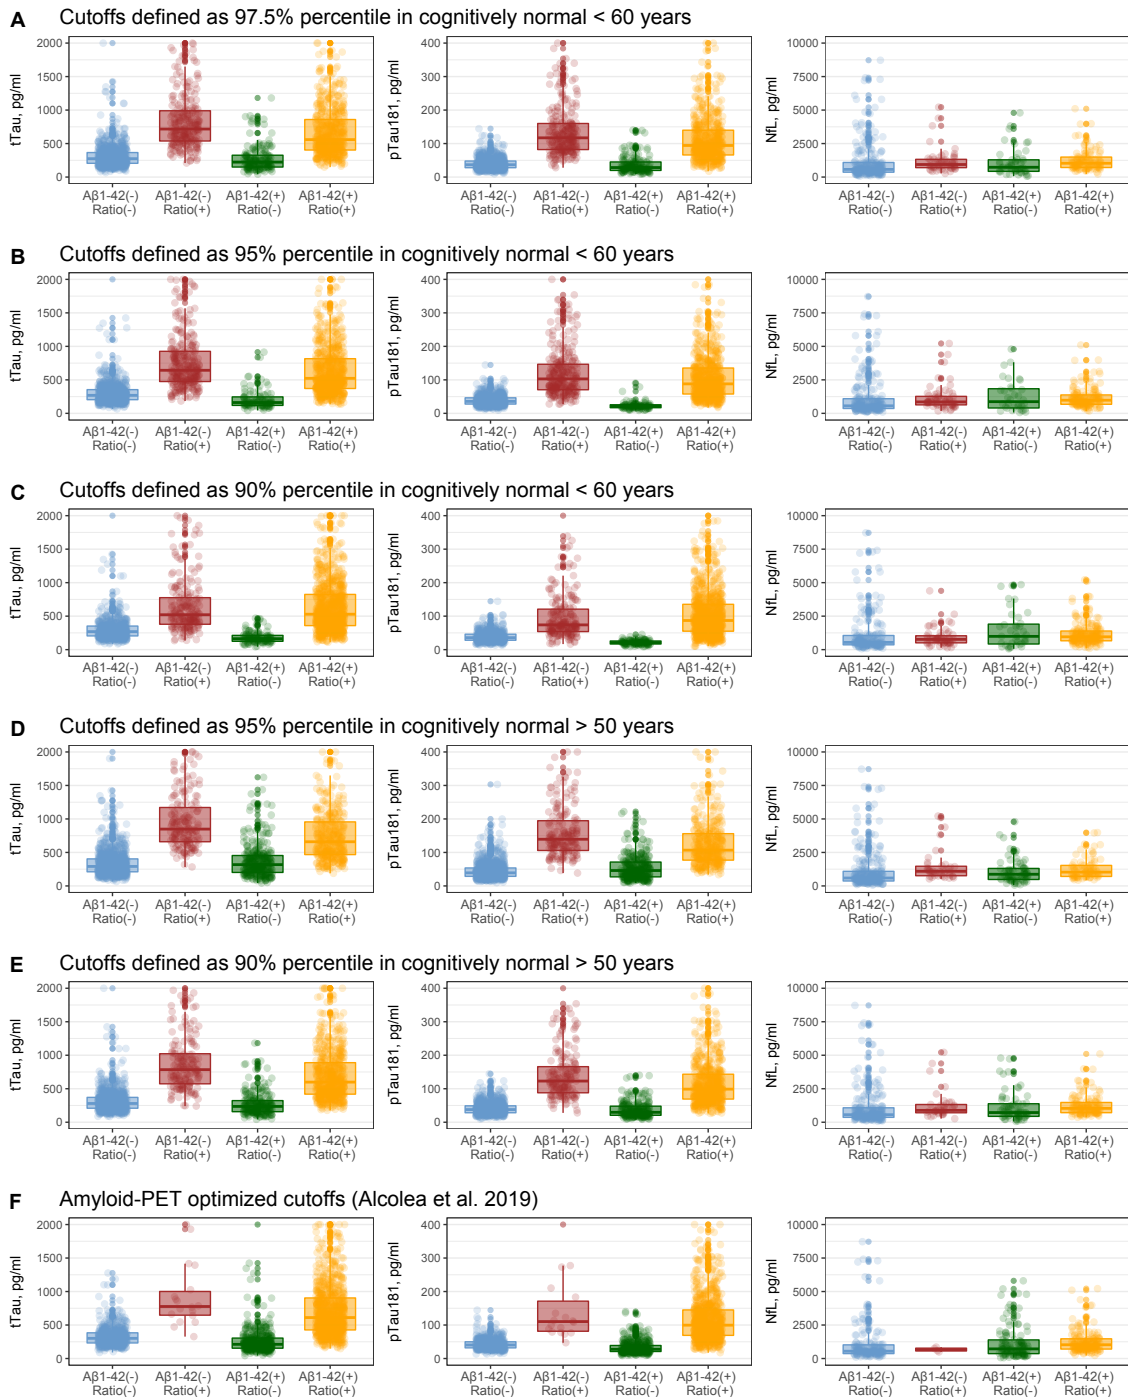

**Supplementary Figure 12: Estimation of the annual change in cognitive and functional scores across amyloid profiles stratified by diagnosis**

Estimations of the annual change in MMSE (A), CDR-SOB (B) and FCSRT total score (C) were calculated through linear-mixed models adjusted by baseline MMSE score, baseline age, sex, years of education, pTau181 levels, *APOE4* status and diagnosis. MMSE: Mini-Mental State Examination; CDR-SOB: Clinical Dementia Rating Sum of Boxes; FCSRT: Free and cued selective reminding test; CN: Cognitively normal; AD: Alzheimer’s disease; DLB: dementia with Lewy bodies; FTLD: Frontotemporal lobar degeneration-related syndromes.

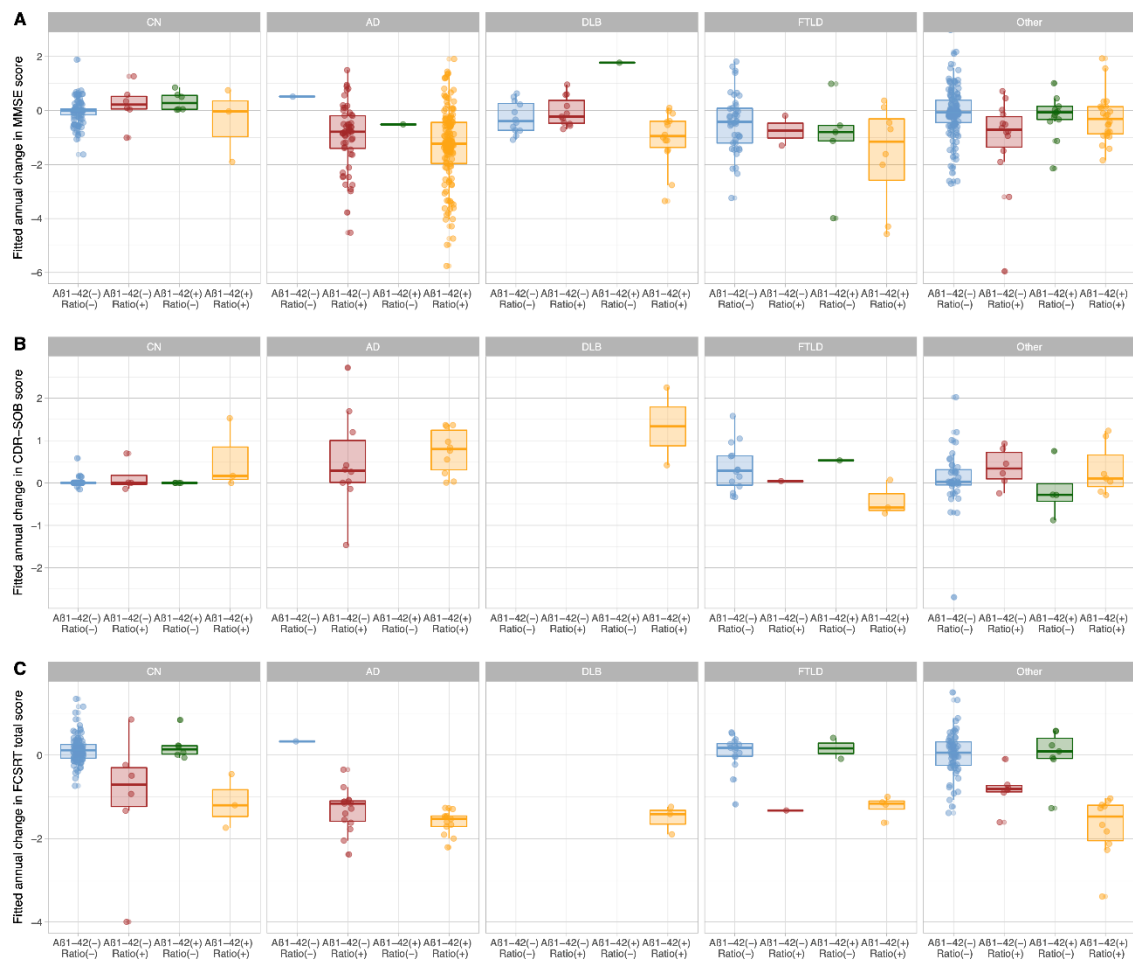

Supplement: MOESM1 [file 20089102]
